# Supplementary material for: How the Ethylene Biosynthesis Pathway of Semi-Halophytes Is Modified with Prolonged Salinity Stress Occurrence?
Source: MDPI journal article supplement (doi:10.3390/ijms25094777), 2024-04-27
Supplement: s1 [file s1]

## Supplementary Table S1-S3 and Figure S1-S2

**Table S1.** Sequencing data statistics of 16 cDNA libraries

| Treatment          | Biological replication | Clean read count | Total bases [Gbp] | GC (%) | AT (%) | Q20 (%) | Q30 (%) |
|--------------------|------------------------|------------------|-------------------|--------|--------|---------|---------|
| Control (C3)       | C3_3                   | 38,985,944       | 5.9               | 46.95  | 53.05  | 97.55   | 93.38   |
|                    | C3_4                   | 41,659,356       | 6.3               | 46.87  | 53.13  | 97.32   | 92.82   |
|                    | C3_5                   | 41,659,356       | 6.3               | 46.87  | 53.13  | 97.32   | 92.82   |
|                    | C3_6                   | 41,205,070       | 6.2               | 46.16  | 53.84  | 97.54   | 93.20   |
|                    | C3_7                   | 41,803,842       | 6.3               | 46.50  | 53.50  | 97.41   | 93.08   |
|                    | C3_8                   | 42,102,086       | 6.3               | 46.34  | 53.66  | 97.44   | 93.12   |
|                    | C3_9                   | 41,579,458       | 6.3               | 46.43  | 53.57  | 97.44   | 93.13   |
|                    | C3_10                  | 40,969,220       | 6.2               | 46.39  | 53.61  | 97.40   | 93.01   |
|                    | Average                | 41,245,542       | 6.3               |        |        |         |         |
|                    | Total                  | 329,964,332      | 49.9              |        |        |         |         |
| NaCl-treated (CAM) | CAM_1                  | 41,869,116       | 6.3               | 46.06  | 53.94  | 97.58   | 93.42   |
|                    | CAM_2                  | 41,315,346       | 6.3               | 46.30  | 53.70  | 97.46   | 93.11   |
|                    | CAM_3                  | 42,406,100       | 6.4               | 45.64  | 54.36  | 97.51   | 93.24   |
|                    | CAM_4                  | 42,465,562       | 6.4               | 45.85  | 54.15  | 97.35   | 92.90   |
|                    | CAM_5                  | 41,028,044       | 6.2               | 46.30  | 53.70  | 97.36   | 93.06   |
|                    | CAM_6                  | 40,935,048       | 6.2               | 46.14  | 53.86  | 97.25   | 92.87   |
|                    | CAM_7                  | 41,827,538       | 6.3               | 46.45  | 53.55  | 97.45   | 93.16   |
|                    | CAM_8                  | 41,075,786       | 6.2               | 46.04  | 53.96  | 97.44   | 93.14   |
|                    | Average                | 41,615,318       | 6.3               |        |        |         |         |
|                    | Total                  | 332,922,540      | 50.3              |        |        |         |         |

Read count: total number of reads, total read bases: total number of bases sequenced, GC – the overall %GC of all bases in all sequences, AT – the overall %AT of all bases in all sequences, Q20(%): ratio of bases that have Phred quality score of over 20; Q30(%): ratio of bases that have Phred quality score of over 30. Phred quality score expresses the accuracy of each nucleotide.

**Table S2.** Numerical summary of *de novo* transcriptome assembly of *M. crystallinum L.*

|                     | Transcripts | Unigenes |
|---------------------|-------------|----------|
| Total number        | 150,442     | 129,206  |
| N50 (bp)            | 1,403       | 1,080    |
| Average length (bp) | 815         | 694      |
| Median length (bp)  | 450         | 397      |

**Table S3.** List of qPCR primer sets used in this study

| Target gene | Accession number | Forward Primer (5' > 3') | Reverse Primer (3' > 5') | Annealing temperature [°C] | Product size [bp] |
|-------------|------------------|--------------------------|--------------------------|----------------------------|-------------------|
| UBQ         | AF053563.1       | CGCACCTTGGCTGACTACA      | AACAACCAGACCATGCAACA     | 56                         | 94                |
| ACS6        | FX943325.1       | GCAGCTTCGATTGTCATCTC     | TTAAGTCCTTGCTCGAACGA     | 56                         | 109               |
| ACS10       | FX909269.1       | CACAAGGAACCAGGAGTCAC     | GCTGGGTCAATATGAGTGGG     | 56                         | 112               |
| ACO1        | AF375993.1       | TGGGGACAAAGCACCAAACT     | GAGCCCCCTTGATTAGGTCGG    | 56                         | 79                |

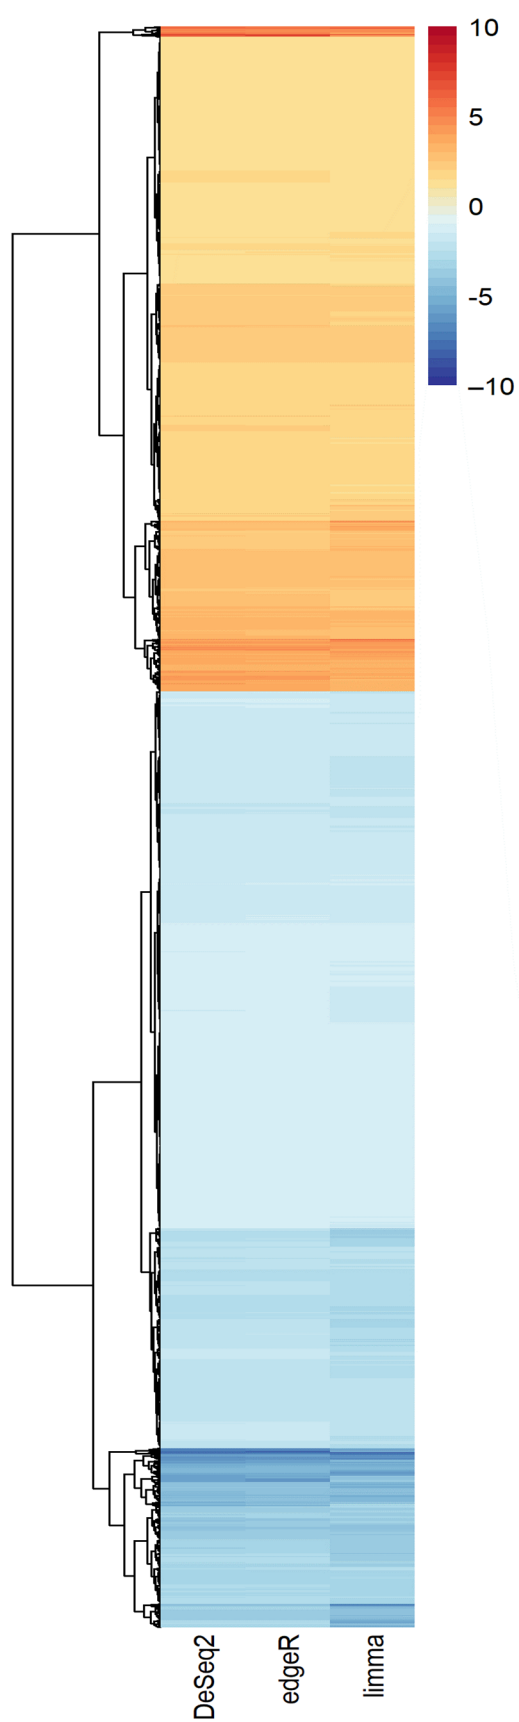

**Figure S1.** Heatmap showing the expression level of 3280 common genes identified using edgeR, DeSeq2 and limma tools; Up- and down-regulated DEGs were marked in orange and blue color, respectively.

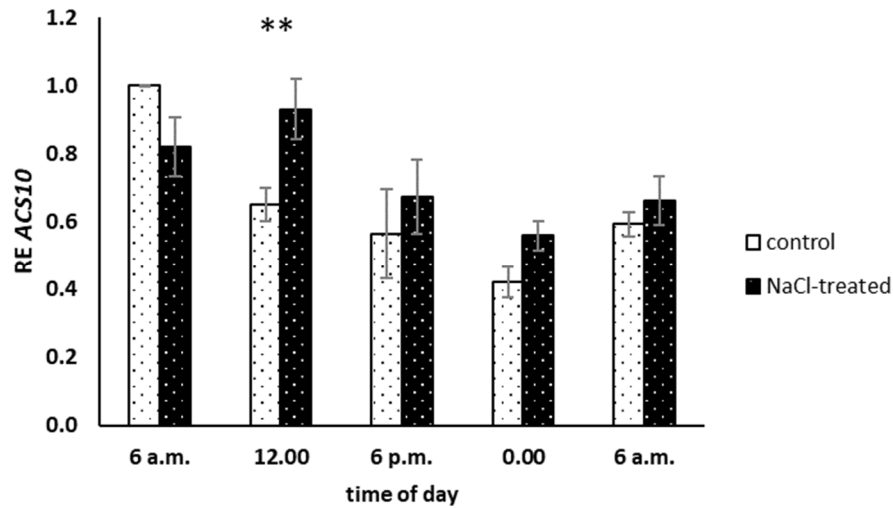

**Figure S2.** Expression of gene not involved in ethylene (ET) biosynthesis pathway, namely 1-aminocyclopropane-1-carboxylic acid (ACC) synthase 10 - *ACS10* analysed every 6 hours during 24-hours-long course in control and NaCl-treated *Mesembryanthemum crystallinum* L. plants. NaCl-treatment was applied for 14 days. Whiskers represent standard errors. The stars above indicate differences in expression between results obtained for C<sub>3</sub>- and CAM ( $N=4$ ) in one time point according to the t-Student test ( $*p \leq 0.05$ ,  $**p \leq 0.01$ ,  $***p \leq 0.005$ ).
